# Supplementary material
Source: Springer Nature journal article supplement (https://www.springermedizin.de/resource/supplementary/12887_2012_642_MOESM2_ESM.pdf/9475390)

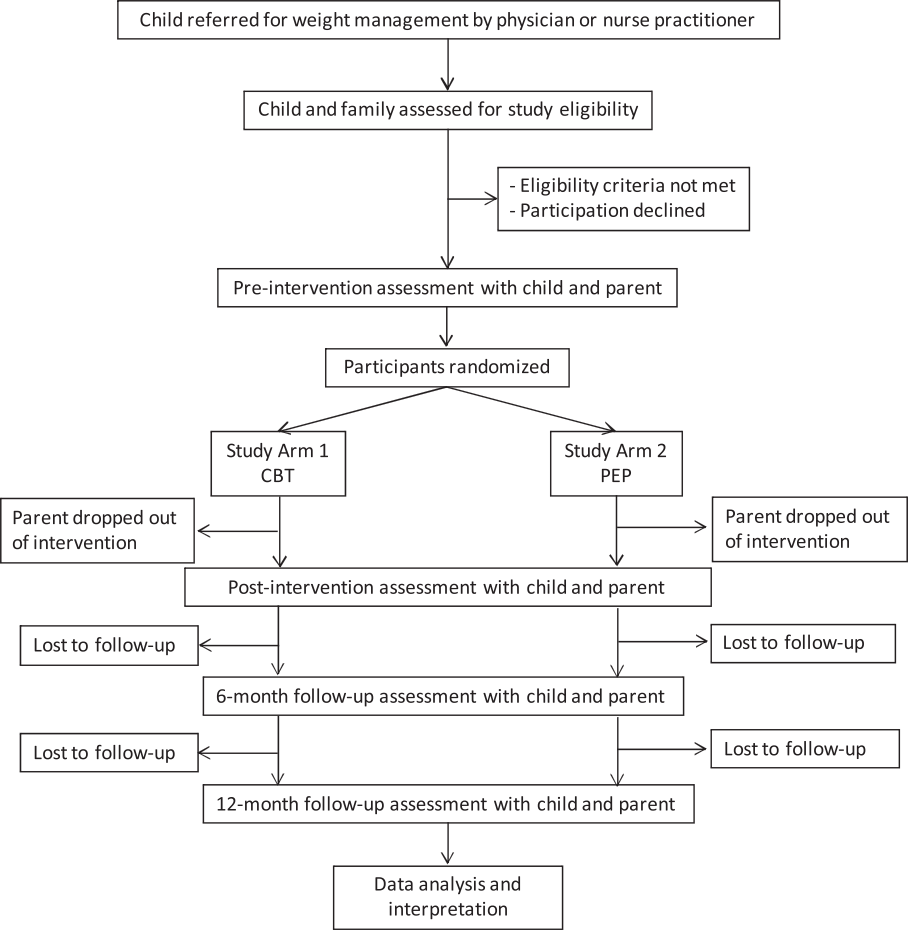

Supplement: MOESM2 [file 9475390]
